# Supplementary material for: Blocking Immune Checkpoint—LAIR1: Disrupting the LAIR1—FXIII-A—Collagen Immunosuppressive Circuit for Enhanced Antitumor Therapeutics
Source: Research Square preprint supplement (doi:10.21203/rs.3.rs-4189094/v1), 2024-04-10
Supplement: Supplementary file 1 [file 51a0f2a66a7861b4d8c2fc39.xlsx]

## Sheet: Fig.1
Fig. 1C
Tmem119+	CD45High	CD45low
46.4	69.8	11
47	81.9	21.5
38	82.4	27.5
37.8	71.3	11.8
47.3	55.2	11.3
69.1	79.8	7.4
66.8	87.5	30.8
74.8	85.6	23.2
Fig. 1G
H Spleen	TB Spleen	Tumor
0.22	0.82	32.7
0.25	2.96	36.1
0.2	0.9	30.5
0.26	0.89	29.4
Fig. 1H
M2+-MΦ	M2--MΦ
27224	11528
13012	9225
16131	7557
21831	12216

## Sheet: Fig.2
Fig. 2B
Days	LAIR1+/++Ctrl T	LAIR1-/-+Ctrl T
80	1
82	1
69	1
102	1
72	1
70	1
78	1
75	1
89	1
73		1
85		1
107		1
107		1
92		1
87		1
79		1
106		1
Fig. 2C
Days	LAIR1-/-+CAR T	LAIR1-/-+Ctrl T
122	1
128	1
95	1
106	1
107	1
147	1
151	1
111	1
106	1
73		1
85		1
107		1
107		1
92		1
87		1
79		1
106		1
Fig. 2D
LAIR1+/+	LAIR1-/-
27.7	21.7
20.6	24.6
20.3	18
22.4	13.2
17	22.8
21.3	37.9
30.3	34.1
22.2	14.9
Fig. 2F
	LAIR1+/++Ctrl T			LAIR1-/-+Ctrl T			LAIR1+/++CAR T			LAIR1-/-+CAR T
All MΦ	53.6	31.7	49	38.5	48.4	56.7	50.8	57.3	45.9	50.9	49	60.8
M2-MΦ	29.5	24.7	30.8	8.8	10.1	12.8	27.6	39.1	33.6	3.1	7.2	11.8
Fig. 2I
		LAIR1+/+										LAIR1-/-
All MΦ		64.4	61	66.3	69.4	62.1	66	60.7	58.1	50.6	69.8	59.6	58	63.8	68.1	55.2	26.6	55.3	43.1	65.2	46.1
M2-MΦ		42.5	44.6	40.7	52.7	40.5	51.1	47.2	48.7	38	49.6	39.3	25.7	46.1	35.8	25.5	15.5	29.5	22.7	25	21.2
Fig. 2J
		LAIR1+/+										LAIR1-/-
CD8+T		0.5	0.4	0.4	0.8	0.9	1.2	1.9	1	1.5	3.4	3.5	10.6	4	4.9	3.6	3.8	3.6	3.3	3.8	2
Act CD8+ T		0.3	0.2	0.4	0.4	0.5	0.6	1	0.8	0.6	1.6	2.5	9.3	2.8	4	2.5	2.9	2.4	2.5	3.3	1.3
CD4+T		1.4	1.7	0.8	1.9	1.5	0.7	1.4	2.4	1.4	2.6	1.3	1	1.4	1.4	1.8	2.9	2	1.3	2	5.2
Act CD4+ T		1.2	1.3	0.6	1.6	1.1	0.5	0.7	1.9	0.7	1.5	1	0.8	1.1	1.1	1.3	2.4	1.5	1	1.8	4.5
Treg		0.1	0.4	0.1	0.5	0.3	0.2	0.3	0.3	0.4	1.1	0.2	0.3	0.2	0.5	0.5	0.9	0.6	0.4	0.5	0.1
B		1.4	0.6	0.1	0.3	0.1	0	0.3	0.2	0	0.4	0.8	0.9	0.1	0	0.8	0.1	0.2	0.1	0.2	0.8
NK		0.2	1.3	0.3	0.3	0.2	0.1	0.7	0.3	0.4	0.1	0.2	0.9	0.3	0.4	1.2	1.5	0.3	0.1	0.6	0.1
DC		1.6	0.8	0.9	0.6	1.7	0.1	0.5	3.1	3.2	0.9	2.5	1	1.8	0.8	2	12.5	3	5.2	1.7	3.4

## Sheet: Fig.3
Fig. 3B			Fig. 3C								Fig. 3F				Fig. 3G				Fig. 3H				Fig. 3I				Fig. 3J				Fig. 3K (Upper)
IgG	aLAIR1		M2+U87+CART+LAIR1 B	M2+U87+CART+IgG	U87 only	CAR-T only	M2 only	U87+CART+LAIR1 B	U87+CART+IgG			CAR T | M2 with aLAIR1	CAR T | M2 with IgG			CAR T | M2 with aLAIR1	CAR T | M2 with IgG			CAR T | M2 with aLAIR1	CAR T | M2 with IgG			CAR T | M2 with aLAIR1	CAR T | M2 with IgG		time (h)	tumor area % (with M2 + aLAIR1)	tumor area % (with M2 + IgG)			CAR T+ Tumor	CAR-T+M2+ IgG	CAR-T+M2+ aLAIR1	NTS-T+M2+IgG	NTS-T+M2+ aLAIR1
1.08	46.9		2.23869	0.88164	0.007097	0.022319	0.000622	1.80608	1.87166		24	103	56			39.8673	19.3043		0	19.3093	2.45697		0	0	0.925939		0	100	100			2588	254.1	2951.08	194.84	285.85
0.54	46.9		2.9916	0.74249	0.022319	0.013601	0.020135	1.69335	1.41912		25	98	57			34.825	30.6044		1	14.6323	3.39089		1	0	2.03718		1	101.005	105.812			2608	252.51	3059.07	209.54	293.43
0.54	43.5		2.50465	0.666282	0.009261	0.026699	0.011429	1.78982	1.65371		26	99	58			22.7182	21.1758		2	17.3935	3.37796		2	6.47927	0		2	101.939	105.576			2560	271.65	3281.55	197.49	302.7
			2.30968	0.609747	0.020135	0.026699	0.017954	2.22548	1.86342		27	95	54			20.2892	13.4847		3	14.9907	6.43756		3	3.38703	0		3	101.363	109.709			2597	237.9	2680.55	177.18	261.05
											28	97	46			30.7749	29.716		4	11.5988	1.82161		4	3.94674	0		4	101.101	107.68
											29	101	49			44.2653	30.358		5	8.93754	6.4747		5	6.7885	2.28873		5	100.056	108.037		Fig. 3K (Downer)
											30	95	50			9.86077	25.9293		6	10.2183	8.60907		6	8.42911	1.5498		6	100.76	112.482			CAR T	CAR-T+M2+ IgG	CAR-T+M2+ aLAIR1	NTS-T+M2+IgG	NTS-T+M2+ aLAIR1
											31	98	43			47.0354	23.9467		7	7.40851	4.94021		7	16.2207	0		7	101.433	112.663			617.32	260.78	796.48	378.08	304.84
											32	104	46			36.6092	14.6485		8	8.8198	2.16123		8	9.58127	0		8	101.948	112.293			632.83	260.93	769.99	393.12	328.57
											33	99	42			41.9616	50.0998		9	10.3183	4.05426		9	7.7381	2.6903		9	101.945	113.541			601.69	271.16	841.96	373.82	293.53
											34	101	41			25.4012	17.4351		10	8.98748	2.16369		10	2.25636	1.63136		10	101.135	115.603			617.69	250.16	779.49	367.33	292.32
											35	101	40			2.66218	38.506		11	8.62378	4.82901		11	4.31364	2.32963		11	100.475	118.221
											36	102	47			47.979	22.6437		12	15.5124	4.1634		12	2.93347	7.36341		12	101.103	119.326
											37	97	43			26.2493	47.4967		13	8.46606	1.49091		13	4.28436	6.90471		13	100.04	123.143
											38	95	42			29.3697	59.0581		14	7.82029	5.13822		14	13.2699	1.27497		14	99.3821	123.27
											39	109	41			42.0662	3.51343		15	10.4064	6.05346		15	7.60304	4.42228		15	99.1549	121.596
											40	98	45			20.8014	43.3129		16	12.6051	4.37835		16	18.3821	2.16834		16	105.068	116.102
											41	96	46			14.8868	63.1085		17	10.9424	5.12152		17	19.2829	3.03487		17	105.099	120.199
											42	106	42			49.1499	39.0938		18	7.82841	7.74007		18	21.4154	3.60551		18	105.069	121.306
											43	101	44			37.6294	23.1002		19	13.152	5.47507		19	22.0677	0		19	105.097	123.51
											44	98	46			30.671	21.8899		20	9.17652	6.93666		20	28.2782	0		20	105.286	126.876
											45	97	44			26.5512	26.8555		21	12.6366	5.81622		21	18.4858	1.65565		21	105.095	130.704
											46	99	45			31.857	39.6708		22	15.7735	4.05762		22	20.765	4.87804		22	105.195	130.921
											47	100	51			34.4311	46.8406		23	11.5819	2.81495		23	19.6203	8.1479		23	105.31	131.225
											48	100	46			17.4664	36.4796		24	10.0146	6.34261		24	22.6972	7.55264		24	105.076	133.115
											49	98	41			48.6297	40.99		25	12.7658	4.619		25	37.3753	7.20523		25	105.468	134.005
											50	101	45			21.6055	37.1023		26	11.1218	5.33389		26	36.6431	1.34695		26	105.315	137.422
											51	101	44			59.2298	27.9811		27	14.0005	4.71973		27	30.9113	5.42663		27	105.869	141.5
											52	100	45			29.1519	38.7406		28	12.3333	4.7054		28	40.5263	5.18306		28	105.238	143.821
											53	97	42			45.2323	13.0912		29	12.4344	1.85441		29	34.2991	7.39273		29	105.097	146.852
											54	99	46			25.3415	30.9063		30	17.1183	4.22555		30	28.6243	8.66784		30	105.137	150.132
											55	98	44			30.2014	36.9036		31	16.0618	3.00606		31	34.7826	5.2038		31	105.333	152.131
											56	98	44			36.861	40.5994		32	12.3638	8.10848		32	26.8675	2.78273		32	107.416	152.429
											57	98	41			36.7854	19.6656		33	16.8169	5.44152		33	53.8909	0		33	106.653	150.575
											58	101	46			38.8515	26.3483		34	15.0794	5.15606		34	42.9355	2.38178		34	105.922	150.897
											59	100	41			36.3462	49.8218		35	18.2685	9.98078		35	54.2358	7.83264		35	106.863	151.661
											60	97	46			34.4432	22.8049		36	17.2071	3.33657		36	41.3752	8.20438		36	106.056	154.801
											61	102	41			30.0172	28.6481		37	11.2076	9.26561		37	46.8144	12.8223		37	106.574	156.204
											62	97	45			55.0662	31.0082		38	12.9257	14.6903		38	51.6677	7.87233		38	106.747	158.237
											63	98	46			22.3001	29.0445		39	13.6082	10.9046		39	44.0528	3.24675		39	106.331	159.15
											64	97	46			50.2455	9.39094		40	14.4143	16.7505		40	56.0968	6.55101		40	105.972	158.026
											65	98	42			20.5245	26.291		41	8.61677	15.8982		41	65.6538	1.3437		41	106.881	158.273
											66	98	44			16.5421	36.6196		42	11.2499	11.3324		42	67.1988	11.6397		42	106.952	157.325
											67	99	43			27.9066	42.2235		43	10.4095	12.6076		43	78.4522	6.47226		43	106.459	160.128
											68	97	41			27.7746	43.8357		44	7.24944	8.02859		44	69.7449	10.7588		44	105.908	160.618
											69	99	46			26.8512	30.6118		45	11.2534	8.25243		45	64.3074	6.33226		45	106.563	158.852
											70	100	43			20.2819	15.2325		46	8.66213	5.77777		46	75.2659	13.5599		46	106.751	159.026
											71	99	43			12.443	13.9436		47	10.0392	9.85994		47	83.0853	11.8384		47	106.388	160.762
											72	97	42			23.8691	15.398		48	13.9031	8.44993		48	78.9409	13.6282		48	107.474	162.812
																35.101	20.5362		49	7.61025	12.9163		49	83.3843	15.3846		49	108.726	164.612
																26.295	41.899		50	7.62905	18.5017		50	80.7633	13.1439		50	107.903	164.833
																50.9287	37.9035		51	8.21283	19.0831		51	96.1634	19.9087		51	106.952	163.634
																67.5845	30.0767		52	5.99086	17.3339		52	90.9421	18.1427		52	106.388	164.685
																34.3964	64.8939		53	7.22468	16.0316		53	84.613	14.529		53	106.769	161.697
																45.8007	20.7776		54	5.14727	18.2087		54	84.0233	16.7675		54	107.057	161.623
																44.7815	32.2396		55	5.03971	19.6324		55	96.9939	12.6145		55	106.776	163.018
																36.4806	17.4015		56	6.38638	22.2144		56	92.6543	19.2335		56	107.851	162.978
																25.5698	15.9242		57	7.56394	23.1848		57	93.9801	25.6969		57	106.368	164.029
																19.4895	10.3781		58	4.21871	23.3083		58	90.2723	24.3036		58	107.503	161.781
																26.0498	47.1585		59	6.31896	24.7158		59	88.3706	20.3989		59	107.662	164.61
																37.1046	9.88704		60	5.80723	18.1893		60	78.5224	17.268		60	106.843	164.207
																40.0803	20.8657		61	5.87079	21.6915		61	80.8498	14.194		61	106.432	160.429
																7.4109	32.3464		62	7.47755	20.1644		62	78.7673	17.7083		62	107.429	161.356
																30.423	35.8012		63	6.07637	23		63	75.3519	18.8646		63	109.599	161.718
																50.111	35.8451		64	5.83171	22.9807		64	78.9407	19.8589		64	108.235	160.16
																47.1499	36.9929		65	5.24662	23.0986		65	80.4598	25.2214		65	111.961	162.319
																43.5781	33.4156		66	2.21955	22.5195		66	78.9263	18.3461		66	106.989	162.989
																28.171	13.7318		67	4.68298	21.6614		67	75.8643	25.4049		67	107.312	165.167
																39.4496	13.1067		68	2.97457	21.7234		68	84.2317	26.5823		68	107.144	165.331
																35.2776	30.9811		69	0.760695	23.2669		69	77.5024	20.3174		69	109.513	165.693
																33.463	35.5881		70	3.23759	22.3224		70	73.2769	21.1336		70	109.895	166.854
																32.8038	45.8822		71	5.0811	28.8265		71	62.3673	13.1299		71	110.949	169.166
																22.2843	25.2963		72	7.38174	31.1902		72	60.6443	26.6135		72	108.323	172.33
																29.9051	29.1957						73	57.806	19.5771
																21.9992	22.7955						74	76.7829	23.6363
																36.3053	35.5271						75	72.3009	29.1816
																56.6968	39.4837						76	77.3109	24.0274
																9.60046	13.4468						77	61.7666	28.5407
																18.9472	25.654						78	62.1552	23.1879
																49.9362	21.0263						79	70.6637	23.2781
																25.4376	25.2663						80	74.8801	24.4883
																37.7749	25.6578						81	65.7279	26.5321
																28.628	34.6825						82	57.2234	29.792
																27.6975	5.74661						83	54.8705	29.2728
																44.8903	35.29						84	62.6852	21.5142
																22.3038	12.7943						85	67.3854	23.337
																29.4008	2.69478						86	68.6359	24.1451
																13.4607	21.6542						87	61.6413	16.7188
																21.8421	21.1624						88	64.4353	17.1691
																98.6727	28.0395						89	66.3767	14.1493
																50.5642	14.4433						90	73.7037	19.4524
																31.4018	25.3508						91	69.4187	15.2711
																35.8227	25.9673						92	72.7583	16.1877
																50.0478	31.0039						93	79.1162	13.2789
																36.9231	9.2424						94	65.5	13.476
																43.1168	4.4237						95	70.877	20.6017
																22.2824	20.0089						96	76.3955	16.1964
																36.9816	15.562						97	84.3779	18.6738
																23.8238	44.1785						98	84.4451	17.4801
																38.4976	46.6245						99	72.1975	22.0714
																47.2225	12.2267						100	82.0698	22.0183
																45.1178	30.0015						101	64.9877	27.8978
																29.7562	36.3594						102	60.0879	30.8204
																27.1124	27.8237						103	79.6616	27.9511
																43.1941	27.5939						104	71.9935	21.7654
																31.5021	18.7916						105	72.4785	25.8473
																23.9706	30.1618						106	73.7639	25.5135
																34.7413	1.07671						107	82.2393	19.9771
																32.0626	27.8244
																25.443	50.7708
																24.5148	38.2716
																23.9425	66.7169
																27.8983	44.4752
																50.0299	0.577055
																30.4745	14.6178
																51.0902	35.615
																55.6299	31.9588
																32.1784	47.3257
																36.6373	13.6155
																37.1533	23.1161
																34.1128	23.2677
																42.7383	49.4558
																34.9175	5.98799
																35.3717	9.65058
																27.076	13.2563
																29.4498	0.540257
																33.3881	13.5248
																44.0435	68.617
																38.8788	55.6182
																50.7927	25.5799
																23.6293	89.6355
																29.3794	23.4142
																26.4544	6.75391
																34.4948	40.1502
																44.3548	10.9668
																33.7941	2.16979
																27.9237	6.47655
																75.1637	18.9868
																17.069	62.7902
																56.5267	13.664
																27.3313	19.2156
																71.6351	9.12513
																46.4236	14.4724
																46.3861	11.9937
																19.4239	56.9627
																57.1683	14.7722
																53.2252	13.1452
																42.144	13.9592
																27.007	17.5018
																27.025	6.60046
																42.0128	26.1723
																52.3198	64.7869
																33.2794	4.58843
																20.0624	6.55315
																32.0724	1.50186
																18.1598	96.658
																61.4977	3.06667
																37.6463	11.4604
																35.0299	34.0946
																33.5001	11.9693
																40.5002	3.35128
																39.9759	3.91671
																33.7254	30.3983
																23.6886	0.905084
																44.3041	17.9944
																44.2585	34.5182
																53.021	8.27203
																4.58884	35.2038
																16.8896	1.69081
																25.4826	17.7833
																27.0725	14.9832
																46.8713	95.5455
																25.5967	8.14808
																53.7505	1.54584
																29.3338	22.9148
																37.9003	15.9385
																49.513	19.4489
																42.8839	25.1125
																24.3162	31.1463
																34.5077	15.2132
																22.6636	17.4263
																43.9215	15.8565
																19.267	33.2267
																15.1271	28.5467
																49.089	8.32567
																18.1185	13.4538
																27.1221	1.9976
																26.326	22.8928
																24.8204	17.7642
																31.9451	10.4367
																28.3147	24.1876
																33.0354	9.89155
																38.3586	11.175
																30.3383	12.9149
																18.2046	11.6863
																31.3522	7.84093
																31.8125	61.5965
																25.3341	28.1232
																45.9504	26.7362
																21.3923	72.6963
																20.3455	14.3034
																38.7912	75.3114
																46.5335	37.6295
																43.0565	14.9676
																70.1392	9.01571
																18.3977	6.43071
																19.3552	5.93321
																30.9326	23.6124
																64.2614	9.73446
																41.3488	7.13358
																79.9623	0.12299
																24.0431	36.3149
																24.4089	5.96956
																62.6414	10.7957
																12.4615	3.06293
																114.372	36.2028
																25.0726	20.7491
																24.6461	10.2356
																37.7747	10.4347
																28.8449	13.0531
																48.4708	8.18899
																6.20577	7.65932
																9.91731	6.05942
																76.0201	1.43718
																59.2604	19.0212
																77.6636	5.51582
																21.8037	13.8722
																29.0494	13.9074
																2.4599	49.0194
																17.3111	7.80202
																71.1745	29.7464
																26.417	12.2652
																27.6745	2.97778
																65.6929	15.7705
																33.772	35.3795
																40.0731	17.3497
																30.1385	9.86289
																17.3142	20.0167
																18.8533	13.6159
																22.5267	8.48563
																59.9453	22.575
																32.5612	16.454
																9.60265	20.5409
																22.3121	2.1296
																27.2404	2.91706
																24.3837	22.4279
																18.5409	26.9557
																90.9639	8.63821
																45.3705	80.0331
																5.93032	8.95777
																61.663	12.4734
																44.9971	17.4499
																9.11396	5.51222
																51.5249	6.05908
																29.8268	13.6367
																33.9086	4.29564
																22.2718	4.57698
																21.8169	11.5226
																20.9328	26.7216
																24.8397	5.29566
																15.5636	3.35215
																33.1375	5.74102
																24.1028	20.8915
																22.7175	68.4437
																25.6683	35.4434
																34.6977	12.1039
																2.08477	3.24634
																116.203	89.4508
																23.503	119.814
																23.4995	12.6444
																24.5329
																24.1967
																27.2161
																24.0745
																24.149
																17.4659
																44.8664
																29.363
																20.4767
																23.8604
																26.1896
																17.6442
																27.1459
																22.1209
																28.7694
																24.3816
																22.7181
																23.5042
																25.9181
																26.5783
																17.5749
																22.2161
																12.4375
																43.8161
																25.5083
																25.2709
																22.4354
																21.2504
																16.8471
																23.3947
																25.3408
																22.9874
																22.1924
																15.285
																24.3579
																17.9373
																25.2064
																28.4024
																21.2053
																34.2417
																7.13996
																21.732
																17.0728
																28.3276
																27.9681
																7.4292
																19.0136
																23.6816
																13.6813
																32.0949
																19.6259
																17.7035
																16.3895
																9.74379
																4.16809
																24.4717
																22.6896
																41.6817
																23.677
																3.86155
																91.2938
																2.4272
																0.516721
																26.5526
																21.9385
																24.2146
																23.403
																25.4323
																20.9864
																19.516
																28.9538
																23.1221
																20.4806
																16.3872
																27.2142
																31.8924
																22.606
																6.34002
																3.52359
																19.2478
																9.06556
																22.1152
																21.7656
																6.6678
																27.1123
																22.5491
																17.7735
																19.6243
																25.7886
																7.53381
																20.2533
																70.647
																10.6489
																15.9755
																16.1897
																24.3735
																23.5132
																40.2451
																28.4592
																15.3451
																16.399
																32.1498
																18.8277
																57.1661
																13.46
																18.4261
																6.70271
																5.43426
																4.7523
																1.15103
																36.1024
																38.4811
																4.93568
																49.5562
																8.47817
																18.8686
																0.660341
																5.81622

## Sheet: Fig.4
Fig. 4C
	IgG								aLAIR1								aPD1
0	0								0								0
6	102000	33700	73400	43100	40500	79800	64500	110000	57000	47900	103000	64000	86900	84500	33300	97400	23900	49800	126000	17300	124000	22400	48100	44500
14	147000	94600	86300	79600	73600	142000	47600	17700	123000	69600	8020	54800	94800	82700	79600	59200	57500	21400	87200	65400	14000	6410	130000	54700
21	469000	618000	994000	537000	392000	902000	270000	87000	430000	201000	406000	211000	649000	271000	311000	264000	68700	156000	4270	242000	318000	38800	43100	105000
28	681000	864000	1240000	1060000	974000	1200000	412000	185000	884000	233000	609000	369000	859000	624000	463000	469000	718000	15300	311000	492000
35	1360000	1990000	2260000	3490000	2770000	4590000	1470000	363000	1320000	439000	1340000	964000	1100000	1390000	751000	811000	1660000	55500	731000	1260000	1930000	588000	2470000	7470000
Fig. 4D
Days elapsed	IgG	aLAIR1	Nontreated
62	1
64	1
64	1
65	1
73	1
77	1
80	1
83	1
75		1
78		1
79		1
80		1
82		1
84		1
93		1
95		1
61			1
61			1
62			1
64			1
74			1
75			1
77			1
79			1
Fig. 4E
Days elapsed	aLAIR1	aPD1
75	1
78	1
79	1
80	1
82	1
84	1
93	1
95	1
74		1
74		1
75		1
76		1
76		1
77		1
79		1
85		1
Fig. 4F
Days elapsed	IgG	aLAIR1
16	1
16	1
17	1
18	1
18	1
19	1
21	1
21	1
21		1
22		1
22		1
23		1
24		1
25		1
29		1
32		1
Fig. 4H
Days	IgG										aLAIR1
0		0									0
6		5	6.12	2.07	6	6.32	5.95	7.01	6.58	5.54	3.82	5.83	8.25	6.71	5.59	4.7	5.26	6.25	7.64
8		7.74	16.7	12.52	12.92	12.11	20.8	12.51	20.42	6.6	4.09	8.51	16.19	14.69	4.27	8.38	14.9	10.33	12.49
10		15.35	30.41	29.48	55.59	21.67	30.27	30.44	35.89	13.36	2.48	6.26	25.89	17.51	5.39	11.23	14.5	17.83	13.81
12		25.49	41.93	38.04	32.95	80.62	39.52	88.82	60.28	82.88	2.42	12.12	43.96	28.22	1.41	20.43	48.12	57.5	24.18
Fig. 4J
aLAIR1+CAR-T	aLAIR1	CAR-T	IgG
214.159	1111.45	909.901	1322.33
141.6	962.992	527.803	884.424
-60.282	1448.67	346.956	2004.58
73.1034	439.9	616.922	1090.27
324.92	-89.4406	700.885	643.119
Fig. 4K
Days elapsed	aALIR1+ CAR-T	aLAIR1	CAR-T	IgG	Nontreated
90	1
91	1
96	1
104	1
120	0
85		1
86		1
91		1
94		1
100		1
98			1
85			1
85			1
76			1
68			1
74				1
75				1
77				1
79				1
63				1
68					1
70					1
72					1
73					1
76					1

## Sheet: Fig.5
Fig. 5D
	IgG			aLAIR1
Tumor	0.052503		Tumor	0.035002
Neutrophils	0.99755		Neutrophils	0.472524
B cells	32.4466		B cells	28.6664
Other T cells	0.80504		Other T cells	1.34757
NK cells	1.05005		NK cells	1.06755
Tgd	0.59503		Tgd	0.315016
Treg	1.61008		Treg	1.64508
Naive Cd4 T	2.83514		Naive Cd4 T	5.54778
Memory Cd8 T	1.47007		Memory Cd8 T	2.39762
Naive Cd8 T	3.53518		Naive Cd8 T	4.90024
DC	0.822541		DC	0.875044
M2 Macrophages	0.910046		M2 Macrophages	0.682534
Macrophages	2.87014		Macrophages	2.0476
Fig. 5E
	IgG			aLAIR1
Tumor	11.6731		Tumor	7.70038
Neutrophils	0.035002		Neutrophils	0.350018
B cells	10.1855		B cells	10.2905
Other T cells	0.035002		Other T cells	0.017501
NK cells	0.087504		NK cells	0.262513
Tgd	0.017501		Tgd	0.157508
Treg	0.367518		Treg	0.910046
Naive Cd4 T	0		Naive Cd4 T	0.122506
Memory Cd8 T	0.99755		Memory Cd8 T	2.55513
Naive Cd8 T	0		Naive Cd8 T	0.087504
DC	0.350018		DC	0.682534
M2 Macrophages	6.65033		M2 Macrophages	2.18761
Macrophages	19.426		Macrophages	24.4837
Fig. 5F
Survival (Days)	% of M2 MΦ
43	20.5
42	28.1
35	38.2
39	31.3
38	30.5
Fig. 5I
	0	1	2	3	4	5	6	7	8	9	10	11	12	13
aLAIR1	20.5	18.2	21.2	5.3	11.1	4.2	9.7	3.9	0.6	1.7	2.1	0.7	0.5	0.3
aPD-1	28.1	25.2	16.5	7.8	3.7	8.9	1.1	4.1	0.9	1.5	0.9	0.6	0.2	0.5
Fig. 5J
	M2 Macrophages	Memory CD8 T	Treg	Tumor
M2 Macrophages	-1.55144	0.231375	-5.39727	-1.07822
Memory CD8 T	-1.48214	-0.529161	-3.06679	-0.277551
Treg	-4.09386	-1.83208	-3.80936	-1.57247
Tumor	-0.00738572	0.034567	-4.81135	-1.10779
Fig. 5K
name	contribution	contribution.scaled	group	contribution.relative.1	pvalues
MIF	0	0	IgG	Inf	0.130859
PD-L1	0.0412493	0.313664	IgG	2.8	0.21875
TNF	0.0439128	0.319944	IgG	2.8	0.769531
MHC-I	1.717	19.2572	IgG	2.1	0.125
ALCAM	0.0331656	0.293579	IgG	1.4	1
SEMA4	0.0250565	0.271251	IgG	1.3	0.012207
CD86	0.241464	0.703713	IgG	1.2	0.15625
CXCL	0.246662	0.714421	IgG	1.2	0.164062
IL1	0.0130144	0.230325	IgG	1.1	0
SN	0.0121086	0.22656	IgG	0.9	0.125
APP	0.413467	1.13228	IgG	0.8	0.21875
FN1	1.18193	16.2946	IgG	0.8	0.0803223
GALECTIN	0.701686	2.82271	IgG	0.7	0.00805664
ICAM	0.142375	0.513007	IgG	0.6	0.00390625
JAM	0.254882	0.731552	IgG	0.5	3.05176e-05
CCL	0.934721	14.8133	IgG	0.5	0.000976562
TGFb	0.272006	0.76809	IgG	0.4	0.00524902
SPP1	0.720364	3.0488	IgG	0.4	0.164062
CD48	0.125775	0.482331	IgG	0.3	0.03125
ITGAL-ITGB2	0.127146	0.484867	IgG	0.2	0.00390625
APRIL	0.0265435	0.27556	IgG	0	0.015625
GAS	0.0973943	0.429371	IgG	0	0.03125
CD45	0.125385	0.48161	IgG	0	0.015625
MIF	0.268715	0.760975	aLAIR1	Inf	0.130859
PD-L1	0.114547	0.461517	aLAIR1	2.8	0.21875
TNF	0.12233	0.475956	aLAIR1	2.8	0.769531
MHC-I	3.56705	22.2199	aLAIR1	2.1	0.125
ALCAM	0.0471828	0.327469	aLAIR1	1.4	1
SEMA4	0.0330494	0.293276	aLAIR1	1.3	0.012207
CD86	0.284099	0.79464	aLAIR1	1.2	0.15625
CXCL	0.291935	0.812199	aLAIR1	1.2	0.164062
IL1	0.0142381	0.235192	aLAIR1	1.1	0
SN	0.0110812	0.222099	aLAIR1	0.9	0.125
APP	0.326161	0.892567	aLAIR1	0.8	0.21875
FN1	0.933641	14.5639	aLAIR1	0.8	0.0803223
GALECTIN	0.512167	1.49453	aLAIR1	0.7	0.00805664
ICAM	0.0790133	0.393989	aLAIR1	0.6	0.00390625
JAM	0.114748	0.461891	aLAIR1	0.5	3.05176e-05
CCL	0.421609	1.15784	aLAIR1	0.5	0.000976562
TGFb	0.107237	0.447885	aLAIR1	0.4	0.00524902
SPP1	0.285188	0.797063	aLAIR1	0.4	0.164062
CD48	0.0378696	0.305473	aLAIR1	0.3	0.03125
ITGAL-ITGB2	0.0314348	0.289031	aLAIR1	0.2	0.00390625
APRIL	0	0	aLAIR1	0	0.015625
GAS	0	0	aLAIR1	0	0.03125
CD45	0	0	aLAIR1	0	0.015625

## Sheet: Fig.6
Fig. 6D
		WT				KO
+ FXIII-A		7583	6910	6911	6940	4743	4631	4894	4729
- FXIII-A		5943	5745	5512		4232	4727	4562
Fig. 6F
+FXIII-A	-FXIII-A
3.72	2.23
5.34	4.05
3.44	3
3.33	3.18
4.86	3.29
3.53	2.92
4.07	3.91
3.78	2.88
4.02	2.92
Fig. 6H
LAIR1+/+	LAIR1-/-
12.9	13.5
10.5	14.1
8.45	11.5
13.6	12.6
6.2	8.54
7.14	11.6
10.3	14.1
10.6	11.8
6.79	6.78
Fig. 6J
LAIR1+/+	LAIR1-/-
122	85.1
147	93.2
122	101
81.7	98.6
84	74.5
102	80.9
136	75.1
114	97
134	114
	91.8
	92.7
	98
Fig. 6L
aLAIR1	IgG
118.943	120.725
129.259	122.346
109.31	136.237
126.595	154.913
116.501	148.98
15.984	163.916
73.386	149.775
114.466	124.732
26.97	118.302
106.528	91.617
85.482	107.152
62.016	127.8

## Sheet: Fig. S1
Fig. S1A
	LAIR1 High
PDCD1	7.3758	21.3034	31.7073	44.8685	9.6502	20.7326	11.807	13.7615	53.1501	18.6366	34.1833	30.4881	3.8722	17.9699	6.4034	105.536	12.5366	15.6822	6.5225	13.6032	14.2207	10.9126	3.2852	41.1172	12.3944	8.4014	23.012	12.1887	15.0517	5.8847	31.9197	6.941	8.844	14.1743	1.8108	1.5004	11.6724	4.3394	22.3496	6.8536	7.076	6.6516	15.083	19.2708	20.7745	8.6114	2.3956	10.2602	15.0054
CD274	15.9808	541.556	109.756	158.329	18.6972	14.5128	45.1745	36.6972	66.8958	41.1967	54.0317	39.3573	66.3117	32.5401	24.0128	9.2272	167.154	64.2969	43.6503	13.6032	9.1013	29.4639	16.8955	28.2421	31.5493	81.2137	40.9103	367.25	18.8147	77.6775	70.6794	172.534	195.831	24.9468	105.025	15.0038	25.5335	28.4474	29.7994	37.3832	13.7357	158.214	13.5747	21.3542	29.3553	66.7384	38.928	35.6663	20.3644
PDCD1LG2	36.8788	683.952	634.146	604.435	158.022	98.1341	147.844	279.817	273.539	307.994	329.704	311.533	78.4124	118.99	114.728	121.107	284.627	99.8432	104.861	100.405	111.49	93.3024	134.225	127.09	121.127	214.436	246.484	263.381	154.751	122.009	215.23	291.522	513.582	238.129	885.468	271.568	276.491	261.813	150.716	219.938	84.4953	582.967	263.952	121.354	304.844	221.206	137.146	234.518	129.689
CTLA4	12.2929	21.3034	26.2195	45.3842	7.2376	3.4554	31.8275	18.3486	38.488	9.8087	11.0269	12.1952	4.3562	1.457	12.8068	9.8039	17.1798	12.5457	1.0035	14.251	7.3948	10.9126	7.9784	26.1655	15.7746	0.8001	30.6827	13.7785	11.7592	3.5308	47.8796	6.4452	19.5831	9.6386	4.2251	12.003	13.1315	7.7146	17.192	15.5763	7.4922	3.3258	13.5747	5.7292	48.3234	17.2228	1.1978	6.3515	10.7181
TIGIT	21.5126	7.288	26.8293	82.001	7.8408	0.6911	13.8604	9.1743	51.3173	3.9235	13.2323	22.1731	4.3562	20.8839	5.3362	7.4971	23.2159	6.7956	20.5708	21.3765	6.2571	3.8194	4.2239	33.6414	2.8169	2.8005	7.6707	16.9581	13.1703	3.1385	7.7519	1.9831	8.844	6.8037	1.2072	2.2506	5.1067	3.3751	27.5072	17.4455	9.5734	9.5023	43.7406	13.5417	10.3873	9.6878	1.7967	5.3744	16.0772
LAG3	22.7419	30.8339	97.561	270.242	18.6972	32.481	27.7207	22.9358	103.551	19.127	34.1833	39.9116	16.4569	25.7407	17.0758	40.3691	17.1798	31.8871	47.1624	33.0364	22.7531	13.6407	11.2636	84.7264	24.7887	10.4018	9.7162	8.4791	16.4628	4.7077	78.8874	13.882	12.0025	30.0496	6.6395	9.7524	11.6724	1.9286	331.232	21.8069	38.7097	28.0318	122.172	47.9167	40.1942	22.0667	15.5712	56.1866	36.4416
[truncated: 111 more columns]

## Sheet: Fig.S9
Fig. S9C
	IgG			aLAIR1
Tumor	0.035002		Tumor	0.035002
Neutrophils	1.40007		Neutrophils	0.472524
B cells	57.0179		B cells	28.6664
Other T cells	2.52013		Other T cells	1.34757
NK cells	1.15506		NK cells	1.06755
Tgd	0.350018		Tgd	0.315016
Treg	3.50018		Treg	1.64508
Naive Cd4 T	11.3056		Naive Cd4 T	5.54778
Memory Cd8 T	4.55023		Memory Cd8 T	2.39762
Naive Cd8 T	11.7606		Naive Cd8 T	4.90024
DC	1.54008		DC	0.875044
M2 Macrophages	1.8901		M2 Macrophages	0.682534
Macrophages	2.90515		Macrophages	2.0476
Fig. S9C
	IgG			aLAIR1
Tumor	22.0511		Tumor	15.8908
Neutrophils	0.210011		Neutrophils	0.490025
B cells	24.5712		B cells	20.301
Other T cells	0.070004		Other T cells	0
NK cells	0.140007		NK cells	0.490025
Tgd	0.175009		Tgd	0.245012
Treg	0.910046		Treg	1.85509
Naive Cd4 T	0.245012		Naive CD4 T	0.105005
Memory Cd8 T	2.90515		Memory CD8 T	3.57018
Naive Cd8 T	0.070004		Naive CD8 T	0.035002
DC	0.525026		DC	1.54008
M2 Macrophages	7.70038		M2 Macrophages	6.26531
Macrophages	40.287		Macrophages	48.5474
Endothelial cells	0.140007		Endothelial cells	0.665033
Fig. S9G
	IgG			aLAIR1
Tumor	0.210011		Tumor	0.070004
Neutrophils	1.33007		Neutrophils	1.75009
B cells	56.7028		B cells	57.9629
Other T cells	2.34512		Other T cells	2.27511
NK cells	1.61008		NK cells	2.0301
Tgd	0.385019		Tgd	0.245012
Treg	3.9552		Treg	3.74519
Naive Cd4 T	13.0206		Naive Cd4 T	10.1855
Memory Cd8 T	3.22016		Memory Cd8 T	4.37522
Naive Cd8 T	9.03045		Naive Cd8 T	10.2205
DC	2.13511		DC	2.17011
M2 Macrophages	1.61008		M2 Macrophages	1.36507
Macrophages	4.44522		Macrophages	3.60518
Fig. S9H
	IgG			aLAIR1_1
Tumor	19.216		Tumor	18.4109
Neutrophils	0.105005		Neutrophils	0.105005
B cells	20.756		B cells	23.8362
Other T cells	0.105005		Other T cells	0.105005
NK cells	0.070004		NK cells	0.455023
Tgd	0.070004		Tgd	0.035002
Treg	0.80504		Treg	1.75009
Naive Cd4 T	0.070004		Naive Cd4 T	0.350018
Memory Cd8 T	2.17011		Memory Cd8 T	3.04515
Naive Cd8 T	0		Naive Cd8 T	0.105005
DC	0.420021		DC	1.57508
M2 Macrophages	6.75534		M2 Macrophages	9.62548
Macrophages	49.2125		Macrophages	40.077
Endothelial cells	0.245012		Endothelial cells	0.525026

## Sheet: Fig. S10
Fig. S10A
IgG	aLAIR1
22.1	15.9
23.3	15.4
19.2	18.4
Fig. S10B
IgG	aLAIR1
0.1	0.5
0.2	0.5
0.1	0.5
Fig. S10C
IgG	aLAIR1
0.5	1.5
0.7	1.4
0.4	1.6

## Sheet: Fig. S11
Fig. S11C
		IgG			aLAIR1
Annexin V+, PI+		4.09	3.94	3.23	4.3	4.44	4.58
Annexin V+, PI-		9.31	9.46	11.7	9.54	9.47	8.71

[truncated: 2 more sheets: Fig.S14, Fig. S15]
